# Supplementary material
Source: JCI journal article supplement (doi:10.1172/jci192689)
Supplement: sd1 [file 1]

## Summary of Features of Career Development Awards for Physician-Scientists

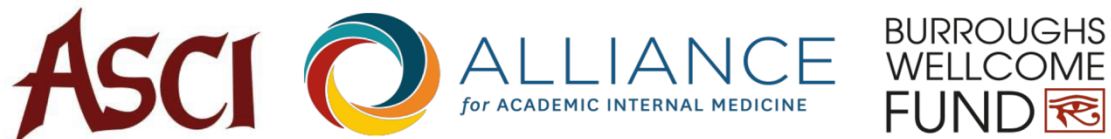

### ASCI/AAIM/BWF Research Pathway Directors Annual Workshop

Sunday, April 7, 2024, 7:00 am-12 pm Central  
Swissotel, Chicago

*Theme: Reimagining Support & Pathways for Physician-Scientists:  
A Collaborative Approach to Enhancing Diversity, Mentorship, and Infrastructure*

## **Supplementary Information - Table of Contents**

- Page 3-4. Supplementary Table 1. NIH institutes supporting different K08 mechanisms
- Page 4. NCI and ARHQ- specific K08 mechanisms
- Page 5-6. Supplementary Table 2. NIH institutes supporting different K23 mechanisms
- Page 7. Supplementary Table 3. Eligibility criteria based on career stage
- Page 8. Supplementary Figure 1. Eligibility criteria based on total years of KL2 and K08/K23 support
- Page 9. Other eligibility criteria for K08/ K23 awards
- Page 10. Protected time
- Page 11. Supplementary Figure 2. Salary and supply budget
- Page 12. K99/R00 for Physician Scientists – NIAID
- Page 13. Administrative supplements for critical life events
- Page 14. VA Career Development Awards (IK2)
- Page 15. 2024 Organizing Committee

**Supplementary Table 1. K08**

| NIH Institute         | <a href="#">PA-24-181</a><br>Clinical Trials Required | <a href="#">PA-24-182</a><br>Clinical Trials Not Allowed | <a href="#">PA-24-183</a><br>BESH | <a href="#">PAR-24-217</a> NIH<br>HEAL PCTP Clinical Trials Required | <a href="#">PAR-24-218</a> NIH<br>HEAL PCTP BESH | <a href="#">PAR-24-219</a> NIH HEAL<br>PCTP Clinical Trials Not Allowed |
|-----------------------|-------------------------------------------------------|----------------------------------------------------------|-----------------------------------|----------------------------------------------------------------------|--------------------------------------------------|-------------------------------------------------------------------------|
| <a href="#">NEI</a>   | ✓                                                     | ✓                                                        | ✓                                 | X                                                                    | X                                                | X                                                                       |
| <a href="#">NHLBI</a> | ✓                                                     | ✓                                                        | X                                 | X                                                                    | X                                                | X                                                                       |
| <a href="#">NHGRI</a> | ✓                                                     | ✓                                                        | X                                 | X                                                                    | X                                                | X                                                                       |
| <a href="#">NIA</a>   | ✓                                                     | ✓                                                        | ✓                                 | ✓                                                                    | ✓                                                | ✓                                                                       |
| <a href="#">NIAAA</a> | ✓                                                     | ✓                                                        | ✓                                 | ✓                                                                    | ✓                                                | ✓                                                                       |
| <a href="#">NIAID</a> | X                                                     | ✓                                                        | X                                 | X                                                                    | X                                                | X                                                                       |
| <a href="#">NIAMS</a> | X                                                     | ✓                                                        | X                                 | ✓                                                                    | ✓                                                | ✓                                                                       |
| <a href="#">NIBIB</a> | ✓                                                     | ✓                                                        | X                                 | ✓                                                                    | X                                                | ✓                                                                       |
| <a href="#">NICHD</a> | ✓                                                     | ✓                                                        | ✓                                 | ✓                                                                    | ✓                                                | ✓                                                                       |
| <a href="#">NIDCD</a> | ✓                                                     | ✓                                                        | ✓                                 | X                                                                    | X                                                | X                                                                       |
| <a href="#">NIDCR</a> | X                                                     | ✓                                                        | X                                 | X                                                                    | X                                                | ✓                                                                       |
| <a href="#">NIDDK</a> | X                                                     | ✓                                                        | X                                 | ✓                                                                    | X                                                | X                                                                       |
| <a href="#">NIDA</a>  | ✓                                                     | ✓                                                        | ✓                                 | X                                                                    | X                                                | X                                                                       |
| <a href="#">NIEHS</a> | ✓                                                     | ✓                                                        | ✓                                 | X                                                                    | X                                                | X                                                                       |
| <a href="#">NIGMS</a> | X                                                     | ✓                                                        | X                                 | X                                                                    | X                                                | X                                                                       |
| <a href="#">NIMH</a>  | ✓                                                     | ✓                                                        | ✓                                 | X                                                                    | X                                                | X                                                                       |
| <a href="#">NINDS</a> | ✓                                                     | ✓                                                        | ✓                                 | ✓                                                                    | ✓                                                | ✓                                                                       |

|                                                                                                                                    |   |   |   |   |   |   |
|------------------------------------------------------------------------------------------------------------------------------------|---|---|---|---|---|---|
| <a href="#">NIMHD</a>                                                                                                              | ✓ | ✓ | ✗ | ✗ | ✗ | ✗ |
| <a href="#">NLM</a>                                                                                                                | ✓ | ✓ | ✗ | ✗ | ✗ | ✗ |
| <a href="#">NCCIH</a>                                                                                                              | ✓ | ✓ | ✓ | ✓ | ✓ | ✓ |
| <a href="#">NCI</a>                                                                                                                | ✓ | ✓ | ✓ | ✓ | ✓ | ✓ |
| BESH: Basic Experimental Studies Involving Humans; HEAL: Helping End Addiction Longterm; PCTP: PainCare Clinician Training Program |   |   |   |   |   |   |

#### Other NCI K08 Awards

[PAR-24-319](#) Continuing Umbrella of Research Experiences (CURE) Clinical Trials Required

[PAR-24-320](#) CURE Clinical Trials Not Allowed

#### AHRQ K08 Awards

[PA-22-232](#): AHRQ Mentored Clinical Scientist Research Career Development Award

[PA-22-050](#): AHRQ Patient-Centered Outcomes Research (PCOR) Mentored Clinical Scientist Career Development Award

**Supplementary Table 2. K23**

|                       | <a href="#">PAR-24-220</a> NIH HEAL PCTP Clinical Trial Required | <a href="#">PA-24-186</a> BESH | <a href="#">PA-24-185</a> Clinical Trial not Allowed | <a href="#">PA-24-184</a> Clinical Trial Required | <a href="#">PAS-22-207</a> Substance Use Prevention and Treatment Clinical Trial Required |
|-----------------------|------------------------------------------------------------------|--------------------------------|------------------------------------------------------|---------------------------------------------------|-------------------------------------------------------------------------------------------|
| <a href="#">NEI</a>   | X                                                                | ✓                              | ✓                                                    | ✓                                                 | X                                                                                         |
| <a href="#">NHLBI</a> | X                                                                | X                              | ✓                                                    | ✓                                                 | X                                                                                         |
| <a href="#">NHGRI</a> | X                                                                | X                              | X                                                    | X                                                 | X                                                                                         |
| <a href="#">NIA</a>   | ✓                                                                | ✓                              | ✓                                                    | ✓                                                 | X                                                                                         |
| <a href="#">NIAAA</a> | ✓                                                                | ✓                              | ✓                                                    | ✓                                                 | ✓                                                                                         |
| <a href="#">NIAID</a> | X                                                                | X                              | ✓                                                    | X                                                 | X                                                                                         |
| <a href="#">NIAMS</a> | ✓                                                                | X                              | ✓                                                    | ✓                                                 | X                                                                                         |
| <a href="#">NIBIB</a> | ✓                                                                | X                              | ✓                                                    | ✓                                                 | X                                                                                         |
| <a href="#">NICHD</a> | ✓                                                                | ✓                              | ✓                                                    | ✓                                                 | X                                                                                         |
| <a href="#">NIDCD</a> | X                                                                | ✓                              | ✓                                                    | ✓                                                 | X                                                                                         |
| <a href="#">NIDCR</a> | X                                                                | X                              | ✓                                                    | X                                                 | X                                                                                         |
| <a href="#">NIDDK</a> | ✓                                                                | X                              | ✓                                                    | ✓                                                 | X                                                                                         |
| <a href="#">NIDA</a>  | X                                                                | ✓                              | ✓                                                    | ✓                                                 | ✓                                                                                         |
| <a href="#">NIEHS</a> | X                                                                | ✓                              | ✓                                                    | ✓                                                 | X                                                                                         |
| <a href="#">NIGMS</a> | X                                                                | X                              | X                                                    | ✓                                                 | X                                                                                         |
| <a href="#">NIMH</a>  | X                                                                | ✓                              | ✓                                                    | ✓                                                 | ✓                                                                                         |
| <a href="#">NINDS</a> | ✓                                                                | ✓                              | ✓                                                    | ✓                                                 | X                                                                                         |
| <a href="#">NIMHD</a> | X                                                                | X                              | ✓                                                    | ✓                                                 | X                                                                                         |

|                                                                                                                                    |   |   |   |   |   |
|------------------------------------------------------------------------------------------------------------------------------------|---|---|---|---|---|
| <a href="#">NLM</a>                                                                                                                | X | X | X | X | X |
| <a href="#">NCCIH</a>                                                                                                              | ✓ | ✓ | ✓ | ✓ | ✓ |
| <a href="#">NCI</a>                                                                                                                | X | X | X | X | ✓ |
| BESH: Basic Experimental Studies Involving Humans; HEAL: Helping End Addiction Longterm; PCTP: PainCare Clinician Training Program |   |   |   |   |   |

## Eligibility Criteria Based on Career Stage

**Supplementary Table 3.**

| NIH Institute | Eligible                                                                                                                                                                                           |
|---------------|----------------------------------------------------------------------------------------------------------------------------------------------------------------------------------------------------|
| NIAAA         | <b>At the time of award</b> , the candidate must have a secured <b>full-time faculty or faculty equivalent appointment</b> in an appropriate research-intensive environment                        |
| NIGMS         | Eligible candidates ... must have <b>completed postgraduate clinical training and have secured a faculty appointment</b> in an appropriate research-intensive environment at the time of the award |
| NIMH          | <b>No more than 6 years</b> of postdoctoral research experience <b>at the time of application</b> initial or resubmission                                                                          |
| NCI           | Postdoctoral or non-tenured junior faculty Assistant Professor, not Associate Professor                                                                                                            |
| NIDCR         | Postdoctoral or early career faculty                                                                                                                                                               |
| NIEHS         | Should have <b>completed clinical training</b> and should be board-eligible <b>by the time of award</b>                                                                                            |
| NIBIB         | <b>Within 10 years</b> of completing residency/fellowship                                                                                                                                          |
| NINDS         | <b>Within 5 years</b> of completing clinical training                                                                                                                                              |

References:

- <https://grants.nih.gov/grants/guide/contacts/IC-specific-information-PA-24-181.html>
- <https://grants.nih.gov/grants/guide/contacts/IC-specific-information-PA-24-182.html>
- <https://grants.nih.gov/grants/guide/contacts/IC-specific-information-PA-24-183.html>
- <https://grants.nih.gov/grants/guide/contacts/IC-specific-information-PA-24-184.html>
- <https://grants.nih.gov/grants/guide/contacts/IC-specific-information-PA-24-185.html>

## Eligibility Criteria Based on Total Years of KL2 and K08/K23 Support

Supplementary Figure 1.

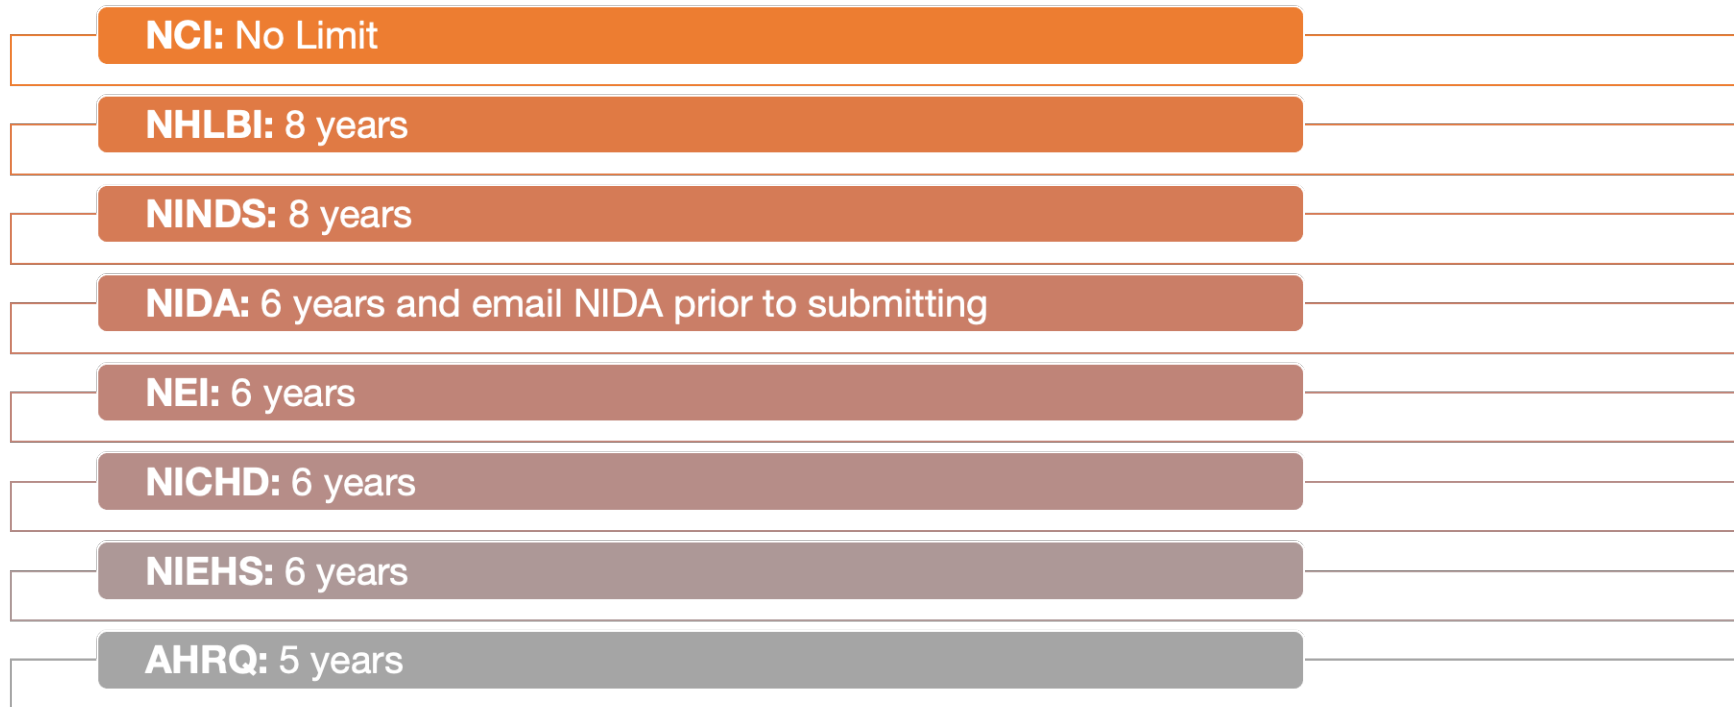

## Other Eligibility Criteria for K08/ K23 Awards

Need active US medical license

US Citizen, Non-citizen, or Permanent Residency Requirement  
at time of award not when applying

## Protected Time

75% Effort for Research & Career Development Activities\*

### \*Exceptions: Minimum 50% Effort Allowed For Some Procedural Specialties

\***NOT-HL-22-022:** NHLBI: surgeons, interventional cardiologists, electrophysiology cardiologists, interventional pulmonologists, and interventional radiologists

\***NOT-CA-21-054:** NCI: U.S.-licensed surgeon-scientists with active surgical duties

\***NOT-DK-25-002:** NIDDK: All surgeon-scientists in sub-specialties recognized by the [American College of Surgeons](#), as well as transplant surgeons

\***NOT-MD-24-017:** NIMHD: Surgeons and clinicians in procedure-intensive specialties. a surgeon is a physician who is clinically active in one of the 14 surgical subspecialties recognized by the [American College of Surgeons](#). Clinicians in procedure-intensive specialties include but are not limited to specialties such as: interventional cardiology, interventional radiology, gastroenterology, interventional radiology, etc.

\***NOT-AG-21-019:** NIA: Surgeons who are clinically active in one of the 14 surgical subspecialties recognized by the [American College of Surgeons](#)

\***NIAMS:** Orthopedic scientists

<https://www.niams.nih.gov/grants-funding/research-training-and-career-development-programs/research-career-development-awards>

\***NOT-HS-22-018:** AHRQ: Surgeons

NIDCD: Surgeon-scientists <https://www.nidcd.nih.gov/training/career-development-awards-k-series#K08>

NIMH: Neurosurgeons <https://www.nimh.nih.gov/funding/training/table-of-k-parameters>

NINDS: Neurosurgeons <https://www.ninds.nih.gov/funding/training-career-development/clinician-scientist/mentored-clinical-scientist-research-career-development-award>

## Salary and Supply Budget

Supplementary Figure 2.

|                                                                             |                                                                                                                                                                                                                          |
|-----------------------------------------------------------------------------|--------------------------------------------------------------------------------------------------------------------------------------------------------------------------------------------------------------------------|
| <p>NCCIH<br/>NICHD<br/>NIDCR<br/>NIDDK</p> <p>NIMHD<br/>NHLBI*<br/>NIA*</p> | <ul style="list-style-type: none"> <li>• Salary: \$100,000</li> <li>• Supplies: \$25,000</li> <li>• *Up to \$50,000 for patient-oriented research</li> </ul>                                                             |
| <p>NIAMS</p>                                                                | <ul style="list-style-type: none"> <li>• Salary: \$100,000</li> <li>• Supplies: \$30,000</li> </ul>                                                                                                                      |
| <p>NIAAA<br/>NIAID<br/>NIDA</p> <p>NIDCD<br/>NIGMS<br/>NIMH</p>             | <ul style="list-style-type: none"> <li>• Salary: \$100,000</li> <li>• Supplies: \$50,000</li> </ul>                                                                                                                      |
| <p>NIBIB</p>                                                                | <ul style="list-style-type: none"> <li>• Salary: \$105,000</li> <li>• Supplies: \$40,000</li> </ul>                                                                                                                      |
| <p>NLM<br/>NINDS*</p>                                                       | <ul style="list-style-type: none"> <li>• Salary: \$125,000</li> <li>• Supplies: \$50,000</li> <li>• * &amp; 1000</li> </ul>                                                                                              |
| <p>NHGRI</p>                                                                | <ul style="list-style-type: none"> <li>• Salary: Commensurate with the applicant institution's salary structure for persons of equivalent qualifications, experience, and rank.</li> <li>• Supplies: \$40,000</li> </ul> |
| <p>NIEHS</p>                                                                | <ul style="list-style-type: none"> <li>• US Legislative Salary Cap</li> <li>• Supplies: \$40,000</li> </ul>                                                                                                              |
| <p>NCI</p>                                                                  | <ul style="list-style-type: none"> <li>• US Legislative Salary Cap</li> <li>• Supplies: \$50,000</li> </ul>                                                                                                              |
| <p>NEI</p>                                                                  | <ul style="list-style-type: none"> <li>• US Legislative Salary Cap</li> <li>• Supplies: \$25,000 up to \$50,000 with sufficient justification</li> </ul>                                                                 |

K99/R00 for Physician Scientists – NIAID

NIAID Physician-Scientist Pathway to Independence Award – Independent Clinical Trial Not Allowed

<https://grants.nih.gov/grants/guide/pa-files/PAR-23-071.html>

NIAID Physician-Scientist Pathway to Independence Award – Clinical Trial Required

<https://grants.nih.gov/grants/guide/pa-files/PAR-23-070.html>

Administrative Supplements for Critical Life Events  
NOT-OD-23-031

This supplement program is intended to ensure continuity of research among recipients of mentored career development K awards by providing supplemental research support to help sustain the investigator's research during a period in which the PD/PI experiences critical life events which have the potential to impact research progress or potential productivity.

For the purposes of this program, critical life events that would qualify for consideration include childbirth, adoption, serious personal health issues or illness and/or debilitating conditions, high-risk pregnancy, and primary caregiving responsibilities of an ailing spouse, child, partner, parent or a member of the immediate family during the project.

The administrative supplement budget is limited to 1 year. The application budget cannot exceed a maximum direct cost of \$70,000

<https://grants.nih.gov/grants/guide/notice-files/NOT-OD-23-031.html>

## VA Career Development Awards: CDA-2 (IK2)

Candidates for Career Development Awards need not have a VA appointment at the time they apply but must be nominated by a VA facility and must identify an appropriate VA mentor.

The sponsoring VA research office must submit the application on behalf of the nominee.

Funding duration: 3-5 years

Salary Support: Full Specialty Specific Salary Support

Research Support: \$65,000/year

<https://www.research.va.gov/funding/cdp.cfm>

## ASCI Research Pathways Working Group

| <b>Name</b>             | <b>Affiliation</b>                                   |
|-------------------------|------------------------------------------------------|
| Ajjola, Olujimi         | University of California, Los Angeles                |
| Barnard, Kristin        | Alliance for Academic Internal Medicine              |
| Baron, Rebecca M.       | Brigham and Women's Hospital, Harvard University     |
| Burns, Audrea           | Baylor College of Medicine                           |
| Choate, Keith           | Yale University                                      |
| Cooper, Paige           | Burroughs Wellcome Fund                              |
| Eltzschig, Holger K     | University of Texas Health Science Center at Houston |
| Gallagher, Emily        | Icahn School of Medicine at Mount Sinai              |
| Gruber, Peter           | Yale University                                      |
| Hawley, John            | American Society for Clinical Investigation          |
| Hu, Patrick J           | Vanderbilt University Medical Center                 |
| Mosammaparast, Nima     | Washington University in St. Louis                   |
| McGarry, Colleen        | American Society for Clinical Investigation          |
| Pittenger, Christopher  | Yale University                                      |
| Rhee, Kyu Y.            | Weill Cornell Medicine                               |
| Rockey, Don C.          | Medical University of South Carolina                 |
| Scharschmidt, Tiffany   | University of California, San Francisco              |
| Steed, Ashley           | Washington University in St. Louis                   |
| Williams, Christopher S | Vanderbilt University Medical Center                 |
